## Review

# Signalling cell cycle arrest and cell death through the MMR System

Vincent O'Brien\* and Robert Brown

Centre for Oncology and Applied Pharmacology, Cancer Research UK  
Beatson Laboratories, Garscube Estate, Glasgow G61 1BD, UK

\*To whom correspondence should be addressed. Tel: +44 0141 330 4125;  
Fax: +44 0141 330 4127;  
Email: v.obrien@beatson.gla.ac.uk

**Loss of DNA mismatch repair (MMR) in mammalian cells, as well as having a causative role in cancer, has been linked to resistance to certain DNA damaging agents including clinically important cytotoxic chemotherapeutics. MMR-deficient cells exhibit defects in G<sub>2</sub>/M cell cycle arrest and cell killing when treated with these agents. MMR-dependent cell cycle arrest occurs, at least for low doses of alkylating agents, only after the second S-phase following DNA alkylation, suggesting that two rounds of DNA replication are required to generate a checkpoint signal. These results point to an indirect role for MMR proteins in damage signalling where aberrant processing of mismatches leads to the generation of DNA structures (single-strand gaps and/or double-strand breaks) that provoke checkpoint activation and cell killing. Significantly, recent studies have revealed that the role of MMR proteins in mismatch repair can be uncoupled from the MMR-dependent damage responses. Thus, there is a threshold of expression of MSH2 or MLH1 required for proper checkpoint and cell-death signalling, even though sub-threshold levels are sufficient for fully functional MMR repair activity. Segregation is also revealed through the identification of mutations in *MLH1* or *MSH2* that provide alleles functional in MMR but not in DNA damage responses and mutations in *MSH6* that compromise MMR but not in apoptotic responses to DNA damaging agents. These studies suggest a direct role for MMR proteins in recognizing and signalling DNA damage responses that is independent of the MMR catalytic repair process. How MMR-dependent G<sub>2</sub> arrest may link to cell death remains elusive and we speculate that it is perhaps the resolution of the MMR-dependent G<sub>2</sub> cell cycle arrest following DNA damage that is important in terms of cell survival.**

**Abbreviations:** ATM, ataxia telangiectasia mutated; ATRIP, ATR interacting protein; DSBs, double-strand breaks; *O*<sup>6</sup>-meG, *O*<sup>6</sup>-methylguanine; MMR, mismatch repair; MNNG, *N*-methyl-*N'*-nitro-*N*-nitrosoguanidine; 6-TG, 6-thioguanine.

## Introduction

The DNA mismatch repair system (MMR) repairs base mismatches after DNA replication, inhibits recombination between non-identical DNA sequences and provokes both checkpoint and apoptotic responses following certain types of DNA damage. Defects in MMR are associated with an increased risk of cancer as cells deficient in MMR have a 'mutator phenotype' in which the rate of spontaneous mutation is greatly elevated. The importance of MMR in mutation avoidance is highlighted by the finding that inherited mutations in MMR genes cause hereditary non-polyposis colon cancer (HNPCC), while somatic mutations of MMR genes and epigenetic silencing of *MLH1* expression are observed in a significant proportion of sporadic cancers (1,2). The MMR system also plays a key role in cell killing in response to alkylating agents, the nucleotide analogue 6-thioguanine (6-TG) and the anti-neoplastic drugs cisplatin and carboplatin. MMR-deficient cells are around 100 times more resistant to killing by alkylating agents and are 2–4-fold more resistant to killing by cisplatin.

Much effort has gone towards understanding the mechanisms of MMR, what DNA modifications are recognized by MMR, how the MMR system couples to cell killing mechanisms and, more recently, the search has begun to reveal novel therapies that kill tumour cells irrespective of their MMR status or are selective for MMR-deficient cells that are resistant to existing chemotherapies. This review will cover recent advances looking to address the mechanisms involved in MMR-dependent cell cycle checkpoint activation and cytotoxic responses.

The reader is directed to recent papers that provide in-depth analyses of MMR mechanisms and highlight advances in our understanding of the biochemistry of MMR (3,4).

## Recognition of DNA damage by MMR

Mismatch recognition is mediated by one of two heterodimers of MutS homologues. hMutS-α (heterodimer of hMSH2 and hMSH6) binds to mismatches and small insertion/deletion loops, whereas hMutS-β (heterodimer of hMSH2 and hMSH3) recognizes larger insertion/deletion loops (2,5–9). A heterodimer of MutL homologues, hMutL-α (hMLH1 and hPMS2 heterodimer), is also essential for functional MMR, although the exact role it plays in the repair process is unclear.

## Alkylating agents and nucleotide analogues

Cytotoxicity of monofunctional alkylating agents, among them anti-cancer agents such as temozolomide, requires a

functional MMR. Mammalian cells proficient in MMR are generally ~100-fold more sensitive to alkylating agents than MMR-deficient counterparts [reviewed in (10,11)]. The model alkylating agents, *N*-methyl-*N'*-nitro-*N*-nitrosoguanidine (MNNG), *N*-methyl-*N*-nitrosourea (MNU) and their analogues in clinical use, temozolomide and dacarbazine, produce mainly *N*<sup>7</sup>-substituted bases but are cytotoxic as a result of methylation of the *O*<sup>6</sup> position of guanine in DNA to form *O*<sup>6</sup>-methylguanine (*O*<sup>6</sup>-meG). *O*<sup>6</sup>-meG can be inactivated by the suicide enzyme *O*<sup>6</sup>-meG methyltransferase (MGMT) that catalyses a direct reversal of base methylation (10,12). Resistance to these agents is associated with loss of expression or function of MMR genes, particularly in the absence of MGMT (13,14). The persistence of *O*<sup>6</sup>-meG causes cytotoxicity in an MMR-dependent fashion: in the absence of a functional MMR, DNA damage accumulates but does not trigger cell death. For this reason, the accumulation of *O*<sup>6</sup>-meG in MMR-deficient cells has been named alkylation or methylation 'tolerance', rather than resistance (10). Tolerance to *O*<sup>6</sup>-meG is associated with cross-tolerance to the base analogue and anti-metabolite 6-TG. The methyl-donor *S*-adenosylmethionine methylates 6-TG to form *S*<sup>6</sup>-methylthioguanine (*S*<sup>6</sup>-meG) in a non-enzymatic reaction, which is incorporated into DNA and is structurally similar to *O*<sup>6</sup>-meG (15).

The role of MMR in tolerance to alkylating agents can be explained by the recognition and binding of *O*<sup>6</sup>-meG and *S*<sup>6</sup>-meG by hMutS. Both *O*<sup>6</sup>-meG and *S*<sup>6</sup>-meG can direct mis-incorporation of T during DNA synthesis. Recognition of these mispairs by components of the MMR system leads directly to activation of signalling cascades which lead to a prolonged G<sub>2</sub> arrest (16) and eventual cell death, although the mechanism of the resulting cell cycle arrest and cell killing are not fully understood (see below).

### Cisplatin

Cisplatin [*cis*-diamminedichloroplatinum (II), CDDP], one of the most commonly used anti-cancer drugs, has also been reported to give rise to lesions that are recognized by, but not processed by, the MMR system (17–19). The purified hMSH2 protein binds to DNA containing cisplatin adducts with high affinity and can specifically recognize DNA containing a single 1,2-d(GpG) adduct (18). The binding of hMSH2 to DNA-containing platinum adducts is selective showing high affinity for adducts of clinically effective platinum drugs such as cisplatin but not for *trans*-platinum adducts (17).

The cytotoxic effect of cisplatin is primarily due to its well-described formation of adducts with DNA (20,21) which leads to replication arrest, cell cycle checkpoint activation and sustained G<sub>2</sub> arrest and, if the damage is too severe, cell death. However, it is not clear if MutS- $\alpha$  would gain access to 1,2GpG adducts *in vivo* as other proteins are known to bind to cisplatin adducts with high affinity (20,21) and other DNA repair pathways such as NER and recombinational repair mechanisms, following replication stalling, are primary mechanisms of repairing cisplatin adducts in DNA. Indeed it can be argued that the 1,3 intrastrand crosslink is the more important therapeutic lesion since it is repaired less efficiently than the 1,2 intrastrand crosslink and its persistence may lead to replication stalling.

Tumour cell lines selected *in vitro* for cisplatin resistance were often found to have lost expression of MLH1 or MSH2 (22–24). Cell lines that have lost expression of MLH1 or MSH2 are ~2- to 4-fold more resistant to cisplatin (25–30).

Low-level resistance is sufficient to allow enrichment of MMR-deficient cells following repeat rounds of cisplatin treatment (29,31) and a reduced response to drug in xenograft models (29,32). Restoration of MMR in drug resistant MMR-deficient cell line models by complementation of the defective gene by chromosome transfer or reversal of epigenetic inactivation restores sensitivity, arguing that the differential sensitivity is due to MMR activity rather than a mutator phenotype allowing accumulation of resistance mutations at loci throughout the genome. Isogenic cell line models using an inducible MLH1 expression system confirms that re-expression of MLH1 confers low-fold sensitivity to cisplatin (30).

A number of reports have suggested that MMR deficiency is associated with clinical outcome to platinum-based chemotherapy. However, most of these studies suffer from small sample size and lack of statistical power making their interpretation difficult. However, there are now several reports in initially chemosensitive tumour types such as testicular, ovarian and breast cancer that cisplatin- or carboplatin-based chemotherapy selects for loss of MMR during treatment of patients and is associated with acquired resistance (33–35). This emphasizes the importance of separating intrinsic markers of tumour prognosis from acquired clinical drug resistance. The predominant mechanism for the loss of MMR in acquired resistance of ovarian tumours appears to be loss of MLH1 expression due to CpG-island methylation and epigenetic silencing (22,33).

Despite these observations, other reports disputing the involvement of MMR in cisplatin resistance have emerged in the last few years. It has been suggested that the widely used ovarian cancer cell line, A2780, contains a small pre-existing population of cells that do not express MLH1 and also harbour a mutation in p53 and that it is this p53 mutation and not loss of MMR that makes the most significant contribution to cisplatin resistance (36–38). In a similar vein, it is now apparent that a major mechanism of inactivation of MMR during drug selection is CpG island methylation and transcriptional silencing of *MLH1*. However, multiple loci become simultaneously methylated in these drug-resistant variants and *MLH1* may be only one of several genes whose inactivation can influence drug sensitivity.

Genetic evidence has also emerged from mice with targeted disruptions in *Msh2* (39) that question the role of MMR in cisplatin resistance. Mouse embryonic stem cells with deficiencies in *Msh2* have similar responses to cisplatin (40). However, the exposure of these cells to low doses of cisplatin resulted in a 2-fold difference in survival in clonogenic assays in cells that had lost *Msh2* expression and most of the surviving clones maintained this resistance level upon further exposure to the drug (40). These workers extended their analyses to generated ES cells in which *Msh2* could be inactivated and re-activated *de novo* using the *cre-lox* system. Again they found no relationship between cisplatin sensitivity and MMR status of the cells (40). However, these studies are at odds with other reports in mice that demonstrate an association between loss of one or more MMR genes and resistance to cisplatin *in vitro* and *in vivo* [reviewed in (41,42)] and so may reflect variations in MMR dependency depending on cell types examined.

### Other DNA damaging agents

The response of cells to other DNA damaging agents has also been reported to be influenced by the MMR status of the cell

[reviewed in (11)]. The isogenic 293T cell line model derived by Jiricny and co-workers, differing only in MLH1 expression (43), was used to test MMR-dependence for sensitivity to ionizing radiation (IR), topoisomerase inhibitors, cross-linking agents (mitomycin C, psoralin/UV and CCNU), MNNG and cisplatin. Their evidence supports a role for loss of MMR only in resistance to alkylating agents and cisplatin (30).

### Models of MMR-dependent DNA damage signalling

Models have been proposed to explain how DNA damage recognized by MMR proteins can lead to cell cycle checkpoint activation and cell death. In one model MMR plays an indirect role by initiating futile cycles of DNA repair as damage on the template strand is repeatedly processed (44) leading to the generation of double-strand breaks (DSBs) that are cytotoxic. Another model suggests a direct signalling role for MMR proteins, that is, DNA damage is recognized by MMR proteins and, in turn, MMR proteins recruit other proteins that relay a signal that permits activation of one or more cell cycle checkpoints. In this review we will describe the experimental evidence supporting or contradicting these models. In addition we will describe further refinements of these models. For instance, recent evidence favours a direct signalling role for MMR proteins through both p53-dependent and p53-independent pathways (see below). However, the details of direct signalling pathways and how they are distinguished from the events of normal MMR are unclear. Further studies favour an indirect role for MMR proteins in damage signalling: aberrant processing of mismatches leads to the generation of DNA structures (single-strand gaps and/or DSBs) that provoke checkpoint activation and cell killing (45–47). How MMR-dependent G<sub>2</sub> arrest may link to cell death remains elusive and we speculate that it is perhaps the resolution of the MMR-dependent G<sub>2</sub> cell cycle arrest following DNA damage that is important in terms of cell survival.

### Checkpoint signalling

Cell cycle progression is constantly monitored to ensure that the correct sequence of events in the process of cell division is achieved and that cells with DNA damage do not replicate. Replication and DNA damage checkpoints stop or slow down cell cycle traverse and so re-establish the correct order of cell cycle transitions after repair of the damage. If repair cannot be effected then the cell is committed to die. For each phase of the cell cycle one or more checkpoints have been identified and individual proteins may have overlapping or distinct functions in the different checkpoints and indeed, as is the case for ATR and Chk1, essential roles in normal division cycles (48,49).

The initial activation of the protein kinase cascade in response to DNA damage is not fully understood, although several protein kinases, such as ataxia telangiectasia mutated (ATM) and ATM- and Rad3-related (ATR), as well as Chk1 and Chk2 are established as principal components involved in sensing and responding to replication stress and DNA damage (50–52). A simplified general model of response to DNA damage is emerging (Figure 1). On one hand, arresting DNA replication leads to the generation of single-strand DNA (ssDNA) gaps that lead to the recruitment of the ATR/ATRIP interacting protein (ATRIP) complex to these gaps, most likely through Replication protein A (RPA) binding to the ssDNA.

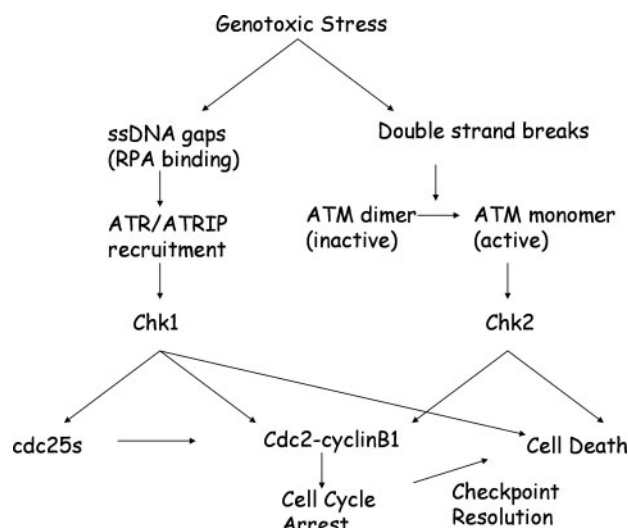

**Fig. 1.** A simplified general model of responses to DNA damage. Genotoxic stresses result in the generation of single-stranded gaps in the DNA (e.g. DNA replication arrest) and/or double-strand breaks (DSBs). The appearance of critically-long single-strand DNA (ssDNA) gaps leads to the recruitment of the ATR/ATR interacting protein (ATRIP) complex, most likely through Replication protein A (RPA) binding to the ssDNA. On the other hand, DNA damage leading to DSBs results in direct activation of ATM through dissociation of inactive dimers via an intramolecular phosphorylation of Ser1981 of ATM. Checkpoint pathways bifurcate at the level of Chk1 and Chk2 to influence both cell cycle arrest, maintenance and resolution of arrest as well as DNA repair and cell killing. Although presented as parallel and exclusive, these pathways often act in concert depending on the damaging agent and its delivered dose and there is a degree of cross-talk between components of the branches.

On the other hand, DNA damage leading to DSBs results in direct activation of ATM and subsequent replication fork arrest, thereby leading to ATR activation. These pathways, however, often act in concert depending on the damaging agent and its delivered dose (53).

The main targets of ATM/ATR-dependent checkpoint signalling in G<sub>2</sub> are cyclin B1 and cdc25C—key regulators of the mitotic kinase cdc2 (54). The activation of cdc2 at the end of G<sub>2</sub> leads to a commitment of the cell to undergo mitosis and inhibition of this kinase following DNA damage plays a key role in the cellular response to genotoxic insults. A recent study identified that there are two distinct G<sub>2</sub> checkpoints associated with DNA damage induced by IR (55). One checkpoint is the response to DNA damage in cells that are already in G<sub>2</sub> at the time of irradiation and reflects the failure of these cells to progress to mitosis. This checkpoint is rapidly engaged but transient, ATM-dependent and relatively independent of the dose of IR used. In contrast, the later-acting checkpoint is ATM-independent, dose-dependent and represents the accumulation of cells in G<sub>2</sub>/M that had been in G<sub>1</sub> or S-phase at the time of DNA damage. This later checkpoint is typically what is measured by bulk staining of cellular DNA with propidium iodide after DNA damage (55). Importantly, the late G<sub>2</sub> checkpoint is not effected by the earlier G<sub>2</sub> checkpoint and G<sub>2</sub> accumulation following DNA damage occurs in cells that do or do not activate the earlier G<sub>2</sub> checkpoint (55).

The cytotoxicity of alkylating agents is associated with a MMR-dependent accumulation of cells in G<sub>2</sub> through signalling mechanisms that are not absolutely dependent on wild-type p53 functions (16,28,56,57). Cells defective for MMR do not arrest in G<sub>2</sub> following exposure to alkylating agents and are resistant to the cytotoxic effects of these agents. The G<sub>2</sub>



checkpoint, and sensitivity to alkylating agents, can be restored by transfer of human chromosome 3, the normal location of *MLH1*, or chromosome 2, the normal location of *MSH2*, into cancer cell lines lacking functional *MLH1* or *MSH2*, respectively (58,59).

Recently, the MMR system has been shown to be required for establishing G<sub>2</sub> accumulation in response to treatment with low doses of S<sub>N</sub>1 alkylating agents and 6-TG (43,47). Furthermore, low doses of MNNG induce a G<sub>2</sub> arrest that is ATR-dependent but not dependent on ATM (47). The cells accumulate in G<sub>2</sub> after the second S-phase following treatment. This suggests that two rounds of DNA replication are required for the generation of the checkpoint signal. Both caffeine and UCN-01, drugs that inhibit ATM/ATR and Chk1, respectively, can abolish the MMR-dependent G<sub>2</sub> arrest. However, the effect is only dependent on ATR, not on ATM, as decreasing ATR expression, or that of its downstream partner Chk1 using RNA interference strategies, prevented the G<sub>2</sub> arrest. Checkpoint activation was accompanied by the formation of nuclear foci containing ATR, phosphorylated  $\gamma$ -H2AX, RPA and other DNA repair proteins. These foci persist after DNA damage and the authors suggest that they may represent sites of irreparable DNA damage that ultimately signal cell killing (47). This report expands on earlier studies and confirms that cells treated with MNU or MNNG arrest only after the second S-phase following exposure to the drug (43,45).

It is not clear why cells treated with MNNG do not arrest after the first S-phase following mismatch generation and recognition by MMR system. It has been proposed that mismatch recognition takes place and the resulting processing leads to the generation of intermediate structures, nicks and/or single-strand gaps in the DNA that are not sufficiently frequent and/or sizeable to activate checkpoint pathways. In the subsequent S-phase, these single-stranded gaps opposite the O<sup>6</sup>-meG residues would be further processed to generate DSBs leading to collapse of the replication forks and ATR-dependent checkpoint activation. These DSBs would require to be repaired by recombination and could lead to sister chromatid exchanges and other chromosomal aberrations. Notably, it has been reported that treatment of MMR-proficient cells with methylating agents increases the frequency of SCEs (45,60).

In a follow-on study, Kaina *et al.* (45) suggest that ATM might protect cells from the cytotoxicity of MNNG by permitting efficient repair of secondary damage resulting from MNNG exposure (SCEs and other chromosomal aberrations) that otherwise would promote cell killing (61). The number of chromosomal aberrations detected in the ATM<sup>-/-</sup> cells was significantly greater than ATM<sup>+/+</sup> cells only after the second mitosis after MNNG treatment (61). When this study is viewed in the light of the results of Stojic *et al.* (47), who found that the downstream target of ATM, Chk2, was activated only 48 h after MNNG treatment in MMR-competent L- $\alpha$ + cells, there appears to be a clear interrelationship between MMR/ATR-dependent cell cycle arrest and ATM/Chk2 signalling following treatment with low doses of MNNG or TMZ: such cells can only complete a successful mitosis if the damage provoking G<sub>2</sub> arrest is repaired by DSB repair, principally by recombination controlled by ATM (11).

However, the model above is at odds with some key aspects of other earlier studies, one of which described a G<sub>2</sub> arrest following the first S-phase after MNNG treatment (62) and

another that demonstrated a rapid activation of ATM following MNNG treatment (63). Significantly, the study by Adamson *et al.* (63) used relatively high concentrations of MNNG (10 and 25  $\mu$ M). Jiricny and co-workers have argued that such high concentrations of drug might result in other DNA repair pathways, for example BER, processing alkylation damage leading to rapid activation of ATM/ATR-dependent checkpoint responses (11).

There remains one outstanding discrepancy between the findings of Jiricny and co-workers and a recent study (64). Wang and Qin (64) found that ATR and its interacting partner, ATRIP, co-immunoprecipitate with MSH2 from HeLa cells and function to regulate the phosphorylation of Chk1 and SMC1 (structural maintenance of chromosome 1) and for activation of an S-phase checkpoint that is independent of ATM. Their data support a model where MSH2 and ATR function to regulate signalling pathways in response to MNNG that branch; phosphorylation/activation of Chk1 by ATR requires checkpoint proteins Rad17 and replication protein A and leads to activation of an S-phase checkpoint. The other branch constitutes phosphorylation of SMC1 by ATR, which is independent of both Rad17 and RPA. This demonstrates that the signalling pathway leading to SMC1 phosphorylation is distinct from that mediated by Chk1 with the phosphorylation of SMC1 being required for cellular survival following MNNG treatment but not for checkpoint activation.

A recent report has also highlighted a genetic link between MMR and ATR demonstrating that ATR haploinsufficiency results in a high degree of genetic instability and accelerated tumorigenesis in cells that are defective for MMR (65). This suggests that monoallelic ATR gene inactivation may be positively selected for during tumour formation as this would drive further genetic instability in a MMR-deficient background (65). This would provide a rationale for the observed ATR mutations in tumours deficient for MMR (66,67). Fang *et al.* (65) also reported a constitutive association between ATR-ATRIP and MLH1 and suggest that MutL complexes function as DNA damage sensors or processing factors for coupling damage to ATRIP-ATR-mediated responses and that MMR/ATR interactions may be involved in maintaining the fidelity of recombination (65).

An alternative or additional role for ATM in the MMR-dependent G<sub>2</sub> checkpoint has also been postulated. A recent study has demonstrated that the early-acting ATM-dependent G<sub>2</sub> checkpoint is lost in MMR-deficient (*Msh2*<sup>-/-</sup>) MEFs when treated with cisplatin (68). This suggests that Msh2-dependent processes are rapidly engaged to trigger the transient, early G<sub>2</sub> checkpoint. These authors propose that this is consistent with post-translational regulation of MMR in the acute response to DNA damage (68). Other reports support this assertion, demonstrating a role for MSH2 in activation of the early G<sub>2</sub> checkpoint and recombinational repair following low-dose IR (69), while other reports have provided evidence that the nuclear accumulation and efficient mismatch recognition by MutS- $\alpha$  is regulated by phosphorylation (70,71) and that there is a rapid redistribution of MutL- $\alpha$  to the nucleus following DNA damage (72).

Similar to the ATM/ATR kinases, activation of stress-activated protein kinases, in particular p38, can also promote G<sub>2</sub> arrest by delaying cdc2 activation via p53/p21-dependent and -independent mechanisms [(73,74), and reviewed in (75)], most likely through activation of the downstream kinase MAPKAP

kinase-2, that these authors suggest may be a 'Chk3' DNA damage effector kinase (76).

A recent study using both pharmacological and genetic approaches revealed that p38 $\alpha$  is necessary for the linkage of methylating agent-induced DNA damage to the G<sub>2</sub> arrest in glioma and colon cancer cell lines treated with temozolomide (77). These authors also demonstrated that processing of O<sup>6</sup>-meG lesions by the MMR system was critical for p38 $\alpha$  activation in response to methylating agents, because only MMR-proficient cells exhibited temozolomide-induced p38 $\alpha$  activation and G<sub>2</sub> arrest, and only after selective depletion of O<sup>6</sup>-meG repair capacity (77). The exact nature of the DNA damage that triggers the biphasic p38 activation following TMZ exposure and the pathways that link this damage to p38 activation remain unclear. Interestingly, p38 $\alpha$  appears to act downstream or independently of Chk1 and Chk2 as these checkpoint kinases remained active (phosphorylated) following pharmacological blockade of p38 or diminution of p38 $\alpha$  expression using RNA interference, even though cdc2 inhibition was relieved, most likely through restored cdc25C activity (77). The outcome of the p38 blockade was, however, mitotic catastrophe and so it is possible that p38 may have a role in proper recovery from G<sub>2</sub> arrest and/or the subsequent mitosis.

A failure to activate p38 in response to cisplatin treatment correlates with resistance to cisplatin (78,79) and this is consistent with the idea that p38 family members play a role in cisplatin-mediated cell killing. It has also been shown that cisplatin treatment leads to phosphorylation of histone H3 at Ser10 and that this phosphorylation is dependent on p38 activity (80). Phosphorylation of Ser10 of histone H3 is associated with mitotic and meiotic chromosome condensation (81–83). Although the exact role of this histone phosphorylation is not understood, these data suggest that there may be a direct link between H3 Ser10 phosphorylation and cisplatin cytotoxicity.

Another study, examining MMR-dependent cell cycle arrest mediated by 6-TG revealed a role for PKB/Akt, that plays a role in the completion of G<sub>2</sub> and M during an unperturbed cell cycle (84), both in overcoming the cell cycle arrest and cell killing associated with 6-TG exposure (85). Three direct targets for PKB that are likely to play a role in the PKB-mediated abrogation of 6-TG induced G<sub>2</sub> arrest have been identified. In the first case, BRCA1, which is a substrate for PKB (86), and which is also known to interact with MMR proteins (87,88) plays a key role in G<sub>2</sub> arrest following DNA damage (89,90). In the second case, it has been shown that activated PKB can inhibit Chk1 by direct phosphorylation on Ser280 and this impairs Chk1 kinase activity in response to IR or replication stress (treatment with hydroxyurea) (91). It has also been shown that dephosphorylation of an ATR site of Chk1 is essential for recovery from G<sub>2</sub> arrest, at least in *Schizosaccharomyces pombe* (92), and most likely in human cells.

### Cell death signalling and MMR

Alkylating agents, including those in common use as cancer chemotherapeutic agents, kill cells mainly through apoptosis resulting from the cellular response to O<sup>6</sup>-MeG (45,93). Two opposing DNA repair pathways govern cytotoxicity, one by direct repair of O<sup>6</sup>-MeG via an alkyltransferase, MGMT (94) the other via MMR.

As the apoptotic response to alkylating agents is strictly dependent on MMR, it has been argued that recognition or processing of DNA damage by MMR proteins is required for induction of p53 and/or p73 and subsequent apoptotic events. Conversely, loss of expression of MMR leads to tolerance of alkylated DNA and may lead to reduced competence for activation of apoptotic pathways.

The tumour suppressor p53 is rapidly stabilized in MMR-dependent manner in cells following exposure to alkylating agents (17,95,96). However, induction of apoptosis in MMR-proficient cells does not appear to require wild-type p53 function (43,96), although there may be a degree of cell-type specificity in the choice of apoptotic programme utilized in response to O<sup>6</sup>-MeG as other workers have examined O<sup>6</sup>-MeG-dependent apoptosis in rodent cells, CHO cells and normal human lymphocytes and found that the extrinsic 'death receptor' pathway and p53 are crucial components of the apoptotic response to MNNG and temozolomide (45,97,98).

A recent report sought to address the relative roles of the mitochondrial and death receptor pathways in response to O<sup>6</sup>-meG (99). There was a MutS $\alpha$ -dependent activation of caspases-2, -3, -8 and -9 in response to MNNG exposure. However, using specific caspase inhibitors, they observed only a minimal requirement for these proteases in the cell death programme triggered by O<sup>6</sup>-MeG mispairs which they also reported to be strictly dependent on mitochondrial death signalling but not death receptor signalling. Significantly, overexpression of either Bcl-2 or Bcl-X<sub>L</sub> could effectively block apoptosis but could not prevent loss of clonal survival of the cells demonstrating that the cells ultimately do die but not by apoptosis (99). Non-apoptotic, MMR-dependent cell death has also been reported for MNNG (43,47) although the ultimate response to alkylating agents is likely to be complex with the demise of the cell a result of either apoptosis, mitotic catastrophe or senescence-like state and, with high doses of alkylating agents, by a regulated form of necrotic death, which may or may not be MMR-dependent (100,101). So, it appears that MMR status, rather than p53 status, is a strong indicator of the susceptibility of cells to alkylation-induced cell death.

For cisplatin, it has been reported that cells are killed following drug treatment through signalling pathways that are regulated by MMR and p53 acting largely independently to promote cell killing (36,102,103). A prominent role has been established for an MMR-dependent signalling pathway that requires the tyrosine kinase c-Abl. Cisplatin exposure leads to activation of c-Abl and JNK kinases and resultant stabilization of the p53 family member p73 in a MMR-dependent manner with subsequent cell death by apoptosis (104). In addition, recent studies have confirmed the importance of p73 for cell killing after DNA damage (105) and in chemoresistance (106).

The p73 gene encodes C-terminal splice variants that are pro-apoptotic isoforms (transactivation-competent; TA) as well as variants that lack the transactivation domain, so called  $\Delta N$  isoforms, that are anti-apoptotic (107). The  $\Delta N$  isoforms are thought to act by blocking transactivation of target genes of both TAp73 and p53 (108). All forms of p73 are phosphorylated and stabilized by c-Abl, suggesting that the outcome to c-Abl activation, i.e. cell death or survival, might be dictated by the ratio of TAp73/ $\Delta N$ -p73 isoforms in the cell (109).

The transcription factor E2F1 directly transactivates p73, causing transcription of p53 target genes in a p53-independent manner, and apoptosis. E2F1 is released from pRb during G<sub>1</sub>

exit, and so the induction of p73 can occur only in early S-phase. It will be interesting to see whether c-Abl-induced apoptosis via p73 is dependent on released E2F1, which would explain why Abl induces apoptosis only after pRb hyperphosphorylation in early S-phase.

Another report has demonstrated that, in response to cis-platin exposure, PMS2 can directly bind and stabilize p73 and enhance its pro-apoptotic activity, thus providing a direct link between MMR and apoptotic signalling (110). Work from our laboratory, demonstrating a direct interaction between MLH1 and c-Myc, support the suggestion of a direct link between MMR and apoptotic signalling (111). Indeed, p73 and c-Myc have been shown to interact directly (112,113), so it could be argued that p73/Myc and MLH1 may form part of a signalling pathway/module involved in determining cell fate in response to DNA damage.

Although MLH1 expression is required for c-Abl activation and subsequent p73 stabilization it is not known how MLH1 accomplishes this (114). Recent reports demonstrate that post-translational modifications, including phosphorylation and acetylation, which appear to be tightly coupled with p300-dependent acetylation (115), in which prior c-Abl-mediated phosphorylation is a pre-requisite, enhances p73-dependent transcriptional activation of pro-apoptotic genes. Recent work has established that recognition of c-Abl phosphorylated Y99 of p73 by Pin1, an enzyme that mediates *cis/trans* isomerization of proteins at phosphoserine–proline or phosphothreonine–proline motifs, promotes the conformational changes in p73 that lead to its stabilization (116). Pin1 has been implicated in the G<sub>2</sub>–M transition of the cell cycle most likely through its interaction with a number of mitotic phosphoproteins, including Polo-like kinase-1 (Plk1) and cdc25C (117).

Other workers have demonstrated that p73- $\alpha$  is negatively regulated by phosphorylation in G<sub>2</sub>/M, most likely by cyclin B-cdc2 (118,119). In addition, another report has demonstrated that Chk1, but not Chk2, interacts with and phosphorylates p73- $\alpha$  on ser47 *in vivo*, and that phosphorylation of p73 by Chk1 is associated with enhancement of p73 transactivation capacity (120,121).

Cell cycle and DNA-damage dependent activation of p73 then appears to be crucial to coupling the G<sub>2</sub> checkpoint in response to DNA damage to cell killing. What role, if any, MMR/MLH1 plays in control of p73 post-translational modifications in response to alkylating agents and cisplatin merits further investigation.

### Expression-level effects of MMR proteins and separation-of-function mutants

While the role of individual protein components in the process of MMR has been studied extensively, much less is known about the regulation of MMR, although it does appear to occur mainly at a post-translational level as RNA for MMR components appear to be constitutively expressed throughout the cell cycle. However, recent findings suggest that the established effect of Bcl-2 to stimulate mutagenesis is probably due to the ability of this protein to suppress *MSH2* gene expression by preventing the inactivation of pRB and subsequent release of E2F transcription factors that activate *MSH2* transcription (122). In addition, hypoxia-inducible factor (HIF-1 $\alpha$ ) can also hinder transcription of *MSH2* and *MSH6* by displacing c-Myc

from the promoter of both MMR genes (123), although this study, conducted using HCT116 cells, is at odds with an earlier study in mouse and other human, tumour-derived cell lines, that reported a specific decrease in MLH1 mRNA only in response to HIF-1 $\alpha$  induction (124).

At the level of protein expression, cells lacking one partner in a heteroduplex involved in MMR also express low levels of the other partner, in spite of normal levels of RNA, suggesting that MMR protein stability is coupled tightly to the stability of its cognate partner (43,125–128). Heterodimer formation by MMR subunits also serves to provide an additional level of control as dimerization of MLH1 and PMS2 appears to regulate the nuclear import of the heterodimer (72).

There is a growing body of experimental evidence indicating that the level of expression of MMR proteins can influence the cellular response to cytotoxic drugs. Cells expressing reduced levels of MLH1 or MSH2 have almost normal levels of MMR activity, do not display microsatellite instability but are more tolerant to DNA damaging compounds. This has important implications for the treatment of cancers that are not defective for MMR but are compromised for MMR-dependent responses following DNA damage.

There is no evidence for haploinsufficiency for MMR repair in humans and tissue from people heterozygous for *MLH1* or *MSH2* does not exhibit MSI (129,130). However, lymphoid cells from HNPCC patients heterozygous for *MSH2* express around half of the normal level of MSH2 and, while these cells are not significantly compromised for MMR, they are resistant to temozolomide (131).

Two recent papers also reveal dominant effects of mis-sense mutations in *Msh2* (132) and *Msh6* (133). Cells from mice expressing an *Msh2* mis-sense mutation (G674A) were MMR-deficient but retained a normal apoptotic response to DNA damaging agents but the mice were highly cancer-prone (132). Similarly, mice with an *Msh6* mis-sense mutation (T1217D; *Msh6*<sup>TD</sup>) are also cancer-prone.

This suggests that defects in MMR alone is sufficient to drive tumorigenesis in these mice, albeit with a delayed tumour onset with respect to the corresponding homozygous-null mice, indicating that the MMR-dependent damage response function could protect from the early occurrence of tumours (132,133).

In both rodent and human cell lines engineered to express a MMR protein for which they are defective, albeit at a relatively low level, the resulting cells are MSI-stable but are compromised in their responses to DNA damaging drugs. One group has shown, using independent gastric carcinoma cell lines, that microsatellite instability is associated with genetic alterations to MLH1 or MSH2 but not with relatively low levels of expression of these proteins. However, responses to alkylating agents were compromised in the cell lines expressing low levels of MLH1 or MSH2 (134,135). These authors suggested that MMR proteins may function in distinct ways in MMR and responses to alkylating agents. Similarly, human colon cancer cell lines that re-express low levels of ectopic *MSH6* corrected MSI but did not restore sensitivity to alkylating agents again suggesting that MMR proteins function beyond the MMR pathway to determine the outcome following DNA damage (136).

Mouse embryonic stem cells engineered to express 10% of the wild-type level of *Msh2* are competent for MMR, reverse their mutator phenotype and suppress homologous recombination yet are as tolerant to MNNG as *Msh2*<sup>-/-</sup> cells (137).



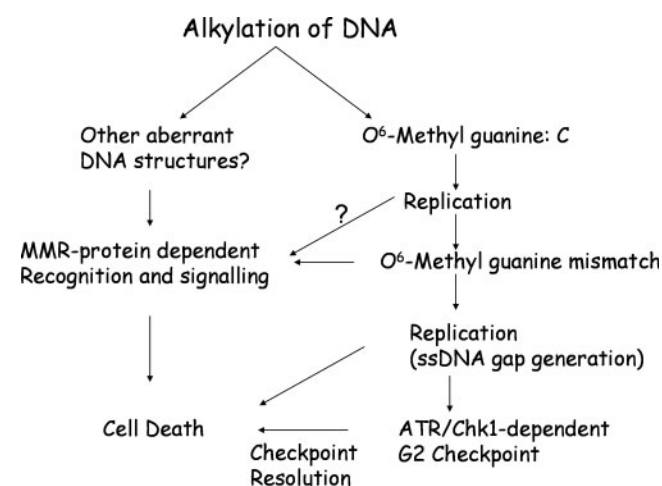

**Fig. 2.** MMR-dependent and MMR-independent DNA damage signalling. Evidence has accumulated demonstrating that G<sub>2</sub> arrest and cell killing in response to alkylating agents arises from MMR-dependent processing of mismatched bases to generate ssDNA gaps and DSBs depending on the concentration of the alkylating agent and, perhaps, the duration of exposure to DNA damaging agent. However, recent results have revealed that the role of MMR proteins in mismatch repair can be uncoupled from the MMR-dependent damage responses: there is a threshold of expression of MSH2 or MLH1 required for proper checkpoint and cell-death signalling, even though sub-threshold levels are sufficient for fully functional MMR repair activity. In addition, recent genetic analyses suggest a direct role for MMR proteins in recognizing and signalling DNA damage responses that are independent of the MMR catalytic repair process.

Methylation tolerance is also associated with a low level of MLH1 expression. Using a derivative of the human embryonic kidney cell line 293T engineered to express a doxycycline-regulated allele of *MLH1* Jiricny and co-workers demonstrated that low levels of MLH1 could correct MMR in the 293T cell but the cells remained as tolerant to MNNG as the parental line (43).

Another recent report demonstrated that a MLH1 D132H variant is associated with susceptibility to sporadic colorectal cancer but these cancers do not display MSI (138). This variant of MLH1 has attenuated ATPase activity and the authors speculate that this may result in uncoupling MMR from apoptosis mediated by MLH1 in response to chemotherapy (138).

The revelation that the MutS- $\alpha$  complex from the *Msh6<sup>TD</sup>* mice can bind to damaged DNA and mediated apoptotic signalling in response to cisplatin, MNNG and 6-TG exposure supports the 'signalling' model where MutS  $\alpha$  is a direct damage sensor and excision and processing of damaged DNA is not required for a MMR-dependent apoptotic signal (133). This is at odds with the experimental evidence reviewed in section 4, which suggests that recognition of DNA damage is not sufficient for cell checkpoint activation and killing. How do we reconcile these apparent discrepancies? One possibility is that MMR-dependent cell killing is biphasic, with an early phase apoptotic response that is not dependent on mismatch processing, and a late-phase mitotic catastrophe that is dependent on prior checkpoint activation and cell cycle arrest. Another possibility, supported by emerging experimental findings, is that MMR proteins function in DNA damage response pathways in addition to MMR (Figure 2) or another possibility is that there may be different processing steps and outcomes from normal MMR compared with repair/processing of DNA damage, even though both are conducted by the MMR system.

The studies described above have important implications for clinical examination of MSI and its use to govern the course of therapy for patients. If MMR capacity can be significantly reduced without affecting MMR efficiency, but does compromise the lethal processing of drug-induced DNA damage, then this may suggest that cancer cells not displaying MSI may still have a compromised MMR-dependent apoptotic response with implications for the outcome of cancer chemotherapy.

### But how does G<sub>2</sub> arrest relate to cytotoxicity?

Given that the recent findings discussed above have revealed that the G<sub>2</sub> arrest in response to alkylating agents is strictly dependent on MMR activity, yet parallel studies have revealed that the role of MMR proteins in the repair process can be uncoupled from the MMR-dependent cell killing response, it is unclear precisely how G<sub>2</sub> arrest relates to cytotoxicity. The absence of a simple correlation between the extent and duration of G<sub>2</sub> arrest and cell killing by methylating agents suggests that cell cycle arrest reflects the processing by MMR of both lethal and non-lethal DNA damage (57). Both sublethal and lethal doses can induce cell cycle checkpoints that are indistinguishable, suggesting again that it is not checkpoint activation *per se* that is important but how the checkpoint is resolved that determines the cell's fate, or more correctly, if the damage sustained can be corrected prior to or just after mitosis in the next G<sub>1</sub>-phase or is tolerated (i.e. does not provoke mitotic catastrophe) during mitosis and into the next G<sub>1</sub>-phase.

The possible outcomes following MMR-dependent G<sub>2</sub> arrest are complicated. The prolonged arrest is associated with the appearance of cells that display a senescence-like phenotype while another population appears to recover from G<sub>2</sub> arrest but undergo mitotic catastrophe. A third subgroup represents cells that successfully resolve G<sub>2</sub> arrest and complete mitosis and remain viable (77). Hirose *et al.* (77) suggested that inhibiting p38- $\alpha$  may have a dual effect: inhibiting senescence, and therefore permitting apoptosis, and also inhibiting the ability of the cells to recover from an aberrant mitosis.

A lot of attention and interest has gone towards unravelling the sequence and details of phosphorylation of protein substrates that activate cell cycle checkpoints. Recently, attention has turned to unravelling the mechanisms that control the dephosphorylation of checkpoint proteins and restarting cell cycle traverse. A number of findings point to Chk1 kinase as a key regulator of checkpoint maintenance and resolution and subsequent mitotic exit (139–143) and recent studies have begun to reveal phosphatases that regulate Chk1 and other checkpoint proteins involved in checkpoint resolution and mitotic progression (92,144–146). Investigating the possible role of MMR proteins in maintenance and resolution of the G<sub>2</sub> checkpoint and the subsequent mitosis after recovery from DNA damage may prove fruitful.

### Acknowledgement

Funding to pay the Open Access publication charges for this article was provided by Cancer Research UK.

*Conflict of Interest Statement:* None declared.

## References

- Jacob, S. and Praz, F. (2002) DNA mismatch repair defects: role in colorectal carcinogenesis. *Biochimie*, **84**, 27–47.
- Palombo, F., Gallinari, P., Iaccarino, I., Lettieri, T., Hughes, M., D'Arrigo, A., Truong, O., Hsuan, J.J. and Jiricny, J. (1995) GTBP, a 160-kilodalton protein essential for mismatch-binding activity in human cells. *Science*, **268**, 1912–1914.
- Buermeyer, A.B., Deschenes, S.M., Baker, S.M. and Liskay, R.M. (1999) Mammalian DNA mismatch repair. *Annu. Rev. Genet.*, **33**, 533–564.
- Schofield, M.J. and Hsieh, P. (2003) DNA mismatch repair: molecular mechanisms and biological function. *Annu. Rev. Microbiol.*, **57**, 579–608.
- Drummond, J.T., Li, G.M., Longley, M.J. and Modrich, P. (1995) Isolation of an hMSH2-p160 heterodimer that restores DNA mismatch repair to tumor cells. *Science*, **268**, 1909–1912.
- Acharya, S., Wilson, T., Gradia, S., Kane, M.F., Guerrette, S., Marsischky, G.T., Kolodner, R. and Fishel, R. (1996) hMSH2 forms specific mispair-binding complexes with hMSH3 and hMSH6. *Proc. Natl Acad. Sci. USA*, **93**, 13629–13634.
- Marsischky, G.T., Filosi, N., Kane, M.F. and Kolodner, R. (1996) Redundancy of *Saccharomyces cerevisiae* MSH3 and MSH6 in MSH2-dependent mismatch repair. *Genes. Dev.*, **10**, 407–420.
- Genschel, J., Littman, S.J., Drummond, J.T. and Modrich, P. (1998) Isolation of MutSbeta from human cells and comparison of the mismatch repair specificities of MutSbeta and MutSalphalpha. *J. Biol. Chem.*, **273**, 19895–19901.
- Guerrette, S., Wilson, T., Gradia, S. and Fishel, R. (1998) Interactions of human hMSH2 with hMSH3 and hMSH2 with hMSH6: examination of mutations found in hereditary nonpolyposis colorectal cancer. *Mol. Cell. Biol.*, **18**, 6616–6623.
- Karran, P. (2001) Mechanisms of tolerance to DNA damaging therapeutic drugs. *Carcinogenesis*, **22**, 1931–1937.
- Stojic, L., Brun, R. and Jiricny, J. (2004) Mismatch repair and DNA damage signalling. *DNA Repair (Amsterdam)*, **3**, 1091–1101.
- Sedgwick, B. and Lindahl, T. (2002) Recent progress on the Ada response for inducible repair of DNA alkylation damage. *Oncogene*, **21**, 8886–8894.
- Branch, P., Aquilina, G., Bignami, M. and Karran, P. (1993) Defective mismatch binding and a mutator phenotype in cells tolerant to DNA damage. *Nature*, **362**, 652–654.
- Kat, A., Thilly, W.G., Fang, W.H., Longley, M.J., Li, G.M. and Modrich, P. (1993) An alkylation-tolerant, mutator human cell line is deficient in strand-specific mismatch repair. *Proc. Natl Acad. Sci. USA*, **90**, 6424–6428.
- Swann, P.F., Waters, T.R., Moulton, D.C., Xu, Y.Z., Zheng, Q., Edwards, M. and Mace, R. (1996) Role of postreplicative DNA mismatch repair in the cytotoxic action of thioguanine. *Science*, **273**, 1109–1111.
- Hawn, M.T., Umar, A., Carethers, J.M., Marra, G., Kunkel, T.A., Boland, C.R. and Koi, M. (1995) Evidence for a connection between the mismatch repair system and the G<sub>2</sub> cell cycle checkpoint. *Cancer Res.*, **55**, 3721–3725.
- Duckett, D.R., Drummond, J.T., Murchie, A.I., Reardon, J.T., Sancar, A., Lilley, D.M. and Modrich, P. (1996) Human MutSalphalpha recognizes damaged DNA base pairs containing O6-methylguanine, O4-methylthymine, or the cisplatin-d(GpG) adduct. *Proc. Natl Acad. Sci. USA*, **93**, 6443–6447.
- Mello, J.A., Acharya, S., Fishel, R. and Essigmann, J.M. (1996) The mismatch-repair protein hMSH2 binds selectively to DNA adducts of the anticancer drug cisplatin. *Chem. Biol.*, **3**, 579–589.
- Yamada, M., O'Regan, E., Brown, R. and Karran, P. (1997) Selective recognition of a cisplatin-DNA adduct by human mismatch repair proteins. *Nucleic Acids Res.*, **25**, 491–496.
- Jamieson, E.R. and Lippard, S.J. (1999) Structure, Recognition, and Processing of Cisplatin-DNA Adducts. *Chem. Rev.*, **99**, 2467–2498.
- Kartalou, M. and Essigmann, J.M. (2001) Recognition of cisplatin adducts by cellular proteins. *Mutat. Res.*, **478**, 1–21.
- Strathdee, G., MacKean, M.J., Illand, M. and Brown, R. (1999) A role for methylation of the hMLH1 promoter in loss of hMLH1 expression and drug resistance in ovarian cancer. *Oncogene*, **18**, 2335–2341.
- Samimi, G., Fink, D., Varki, N.M., Husain, A., Hoskins, W.J., Alberts, D.S. and Howell, S.B. (2000) Analysis of MLH1 and MSH2 expression in ovarian cancer before and after platinum drug-based chemotherapy. *Clin. Cancer Res.*, **6**, 1415–1421.
- Watanabe, Y., Koi, M., Hemmi, H., Hoshai, H. and Noda, K. (2001) A change in microsatellite instability caused by cisplatin-based chemotherapy of ovarian cancer. *Br. J. Cancer*, **85**, 1064–1069.
- Anthony, D.A., McIlwrath, A.J., Gallagher, W.M., Edlin, A.R. and Brown, R. (1996) Microsatellite instability, apoptosis, and loss of p53 function in drug-resistant tumor cells. *Cancer Res.*, **56**, 1374–1381.
- Aebi, S., Kurdi-Haidar, B., Gordon, R. et al. (1996) Loss of DNA mismatch repair in acquired resistance to cisplatin. *Cancer Res.*, **56**, 3087–3090.
- Drummond, J.T., Anthony, A., Brown, R. and Modrich, P. (1996) Cisplatin and adriamycin resistance are associated with MutLalpha and mismatch repair deficiency in an ovarian tumor cell line. *J. Biol. Chem.*, **271**, 19645–19648.
- Brown, R., Hirst, G.L., Gallagher, W.M., McIlwrath, A.J., Margison, G.P., van der Zee, A.G. and Anthony, D.A. (1997) hMLH1 expression and cellular responses of ovarian tumour cells to treatment with cytotoxic anticancer agents. *Oncogene*, **15**, 45–52.
- Fink, D., Zheng, H., Nebel, S., Norris, P.S., Aebi, S., Lin, T.P., Nehme, A., Christen, R.D., Haas, M., MacLeod, C.L. and Howell, S.B. (1997) *In vitro* and *in vivo* resistance to cisplatin in cells that have lost DNA mismatch repair. *Cancer Res.*, **57**, 1841–1845.
- Papouli, E., Cejka, P. and Jiricny, J. (2004) Dependence of the cytotoxicity of DNA-damaging agents on the mismatch repair status of human cells. *Cancer Res.*, **64**, 3391–3394.
- Fink, D., Nebel, S., Norris, P.S., Baergen, R.N., Wilczynski, S.P., Costa, M.J., Haas, M., Cannistra, S.A. and Howell, S.B. (1998) Enrichment for DNA mismatch repair-deficient cells during treatment with cisplatin. *Int. J. Cancer*, **77**, 741–746.
- Plumb, J.A., Strathdee, G., Sludden, J., Kaye, S.B. and Brown, R. (2000) Reversal of drug resistance in human tumor xenografts by 2'-deoxy-5-azacytidine-induced demethylation of the hMLH1 gene promoter. *Cancer Res.*, **60**, 6039–6044.
- Gifford, G., Paul, J., Vasey, P.A., Kaye, S.B. and Brown, R. (2004) The acquisition of hMLH1 methylation in plasma DNA after chemotherapy predicts poor survival for ovarian cancer patients. *Clin. Cancer Res.*, **10**, 4420–4426.
- Mackay, H.J., Cameron, D., Rahilly, M., MacKean, M.J., Paul, J., Kaye, S.B. and Brown, R. (2000) Reduced MLH1 expression in breast tumors after primary chemotherapy predicts disease-free survival. *J. Clin. Oncol.*, **18**, 87–93.
- Mayer, F., Gillis, A.J., Dinjens, W., Oosterhuis, J.W., Bokemeyer, C. and Looijenga, L.H. (2002) Microsatellite instability of germ cell tumors is associated with resistance to systemic treatment. *Cancer Res.*, **62**, 2758–2760.
- Branch, P., Masson, M., Aquilina, G., Bignami, M. and Karran, P. (2000) Spontaneous development of drug resistance: mismatch repair and p53 defects in resistance to cisplatin in human tumor cells. *Oncogene*, **19**, 3138–3145.
- Aquilina, G., Ceccotti, S., Martinelli, S., Soddu, S., Crescenzi, M., Branch, P., Karran, P. and Bignami, M. (2000) Mismatch repair and p53 independently affect sensitivity to N-(2-chloroethyl)-N'-cyclohexyl-N-nitrosourea. *Clin. Cancer Res.*, **6**, 671–680.
- Massey, A., Offman, J., Macpherson, P. and Karran, P. (2003) DNA mismatch repair and acquired cisplatin resistance in *E. coli* and human ovarian carcinoma cells. *DNA Repair (Amsterdam)*, **2**, 73–89.
- de Wind, N., Dekker, M., Berns, A., Radman, M. and te Riele, H. (1995) Inactivation of the mouse Msh2 gene results in mismatch repair deficiency, methylation tolerance, hyperrecombination, and predisposition to cancer. *Cell*, **82**, 321–330.
- Claij, N. and te Riele, H. (2004) Msh2 deficiency does not contribute to cisplatin resistance in mouse embryonic stem cells. *Oncogene*, **23**, 260–266.
- Wei, K., Kucherlapati, R. and Edelmann, W. (2002) Mouse models for human DNA mismatch-repair gene defects. *Trends Mol. Med.*, **8**, 346–353.
- Fedier, A. and Fink, D. (2004) Mutations in DNA mismatch repair genes: implications for DNA damage signaling and drug sensitivity (review). *Int. J. Oncol.*, **24**, 1039–1047.
- Cejka, P., Stojic, L., Mojas, N., Russell, A.M., Heinemann, K., Cannavo, E., di Pietro, M., Marra, G. and Jiricny, J. (2003) Methylation-induced G(2)/M arrest requires a full complement of the mismatch repair protein hMLH1. *EMBO J.*, **22**, 2245–2254.
- Karran, P. and Bignami, M. (1994) DNA damage tolerance, mismatch repair and genome instability. *Bioessays*, **16**, 833–839.
- Kaina, B., Ziouta, A., Ochs, K. and Coquerelle, T. (1997) Chromosomal instability, reproductive cell death and apoptosis induced by O6-methylguanine in Mex-, Mex+ and methylation-tolerant mismatch repair compromised cells: facts and models. *Mutat. Res.*, **381**, 227–241.
- Yan, T., Berry, S.E., Desai, A.B. and Kinsella, T.J. (2003) DNA mismatch repair (MMR) mediates 6-thioguanine genotoxicity by introducing



- single-strand breaks to signal a G<sub>2</sub>-M arrest in MMR-proficient RKO cells. *Clin. Cancer Res.*, **9**, 2327–2334.
47. Stojic, L., Mojas, N., Cejka, P., Di Pietro, M., Ferrari, S., Marra, G. and Jiricny, J. (2004) Mismatch repair-dependent G<sub>2</sub> checkpoint induced by low doses of SN1 type methylating agents requires the ATR kinase. *Genes Dev.*, **18**, 1331–1344.
  48. Damia, G. and Broggin, M. (2004) Cell cycle checkpoint proteins and cellular response to treatment by anticancer agents. *Cell Cycle*, **3**, 46–50.
  49. Lam, M.H., Liu, Q., Elledge, S.J. and Rosen, J.M. (2004) Chk1 is haploinsufficient for multiple functions critical to tumor suppression. *Cancer Cell*, **6**, 45–59.
  50. Zhou, B.B. and Elledge, S.J. (2000) The DNA damage response: putting checkpoints in perspective. *Nature*, **408**, 433–439.
  51. Abraham, R.T. (2001) Cell cycle checkpoint signaling through the ATM and ATR kinases. *Genes Dev.*, **15**, 2177–2196.
  52. Bartek, J. and Lukas, J. (2003) Chk1 and Chk2 kinases in checkpoint control and cancer. *Cancer Cell*, **3**, 421–429.
  53. Kastan, M.B. and Bartek, J. (2004) Cell-cycle checkpoints and cancer. *Nature*, **432**, 316–323.
  54. Kastan, M.B., Lim, D.S., Kim, S.T., Xu, B. and Canman, C. (2000) Multiple signaling pathways involving ATM. *Cold Spring Harb. Symp. Quant. Biol.*, **65**, 521–526.
  55. Xu, B., Kim, S.T., Lim, D.S. and Kastan, M.B. (2002) Two molecularly distinct G<sub>2</sub>/M checkpoints are induced by ionizing irradiation. *Mol. Cell. Biol.*, **22**, 1049–1059.
  56. Moreland, N.J., Illand, M., Kim, Y.T., Paul, J. and Brown, R. (1999) Modulation of drug resistance mediated by loss of mismatch repair by the DNA polymerase inhibitor aphidicolin. *Cancer Res.*, **59**, 2102–2106.
  57. Aquilina, G., Crescenzi, M. and Bignami, M. (1999) Mismatch repair, G<sub>2</sub>/M cell cycle arrest and lethality after DNA damage. *Carcinogenesis*, **20**, 2317–2326.
  58. Koi, M., Umar, A., Chauhan, D.P., Cherian, S.P., Carethers, J.M., Kunkel, T.A. and Boland, C.R. (1994) Human chromosome 3 corrects mismatch repair deficiency and microsatellite instability and reduces N-methyl-N'-nitro-N-nitrosoguanidine tolerance in colon tumor cells with homozygous hMLH1 mutation. *Cancer Res.*, **54**, 4308–4312.
  59. Umar, A., Koi, M., Risinger, J.I., Glaab, W.E., Tindall, K.R., Kolodner, R.D., Boland, C.R., Barrett, J.C. and Kunkel, T.A. (1997) Correction of hypermutability, N-methyl-N'-nitro-N-nitrosoguanidine resistance, and defective DNA mismatch repair by introducing chromosome 2 into human tumor cells with mutations in MSH2 and MSH6. *Cancer Res.*, **57**, 3949–3955.
  60. Durant, S.T., Morris, M.M., Illand, M., McKay, H.J., McCormick, C., Hirst, G.L., Borts, R.H. and Brown, R. (1999) Dependence on RAD52 and RAD1 for anticancer drug resistance mediated by inactivation of mismatch repair genes. *Curr. Biol.*, **9**, 51–54.
  61. Debiak, M., Nikolova, T. and Kaina, B. (2004) Loss of ATM sensitizes against O6-methylguanine triggered apoptosis, SCEs and chromosomal aberrations. *DNA Repair (Amsterdam)*, **3**, 359–368.
  62. Carethers, J.M., Hawn, M.T., Chauhan, D.P., Luce, M.C., Marra, G., Koi, M. and Boland, C.R. (1996) Competency in mismatch repair prohibits clonal expansion of cancer cells treated with N-methyl-N'-nitro-N-nitrosoguanidine. *J. Clin. Invest.*, **98**, 199–206.
  63. Adamson, A.W., Kim, W.J., Shangary, S., Baskaran, R. and Brown, K.D. (2002) ATM is activated in response to N-methyl-N'-nitro-N-nitrosoguanidine-induced DNA alkylation. *J. Biol. Chem.*, **277**, 38222–38229.
  64. Wang, Y. and Qin, J. (2003) MSH2 and ATR form a signaling module and regulate two branches of the damage response to DNA methylation. *Proc. Natl Acad. Sci. USA*, **100**, 15387–15392.
  65. Fang, Y., Tsao, C.C., Goodman, B.K., Furumai, R., Tirado, C.A., Abraham, R.T. and Wang, X.F. (2004) ATR functions as a gene dosage-dependent tumor suppressor on a mismatch repair-deficient background. *EMBO J.*, **23**, 3164–3174.
  66. Menoyo, A., Alazzouzi, H., Espin, E., Armengol, M., Yamamoto, H. and Schwartz, S. Jr (2001) Somatic mutations in the DNA damage-response genes ATR and CHK1 in sporadic stomach tumors with microsatellite instability. *Cancer Res.*, **61**, 7727–7730.
  67. Vassileva, V., Millar, A., Briollais, L., Chapman, W. and Bapat, B. (2002) Genes involved in DNA repair are mutational targets in endometrial cancers with microsatellite instability. *Cancer Res.*, **62**, 4095–4099.
  68. Marquez, N., Chappell, S.C., Sansom, O.J., Clarke, A.R., Court, J., Errington, R.J. and Smith, P.J. (2003) Single cell tracking reveals that Msh2 is a key component of an early-acting DNA damage-activated G<sub>2</sub> checkpoint. *Oncogene*, **22**, 7642–7648.
  69. Franchitto, A., Pichierri, P., Piergentili, R., Crescenzi, M., Bignami, M. and Palitti, F. (2003) The mammalian mismatch repair protein MSH2 is required for correct MRE11 and RAD51 relocalization and for efficient cell cycle arrest induced by ionizing radiation in G<sub>2</sub> phase. *Oncogene*, **22**, 2110–2120.
  70. Christmann, M. and Kaina, B. (2000) Nuclear translocation of mismatch repair proteins MSH2 and MSH6 as a response of cells to alkylating agents. *J. Biol. Chem.*, **275**, 36256–36262.
  71. Christmann, M., Tomicic, M.T. and Kaina, B. (2002) Phosphorylation of mismatch repair proteins MSH2 and MSH6 affecting MutSalpha mismatch-binding activity. *Nucleic Acids Res.*, **30**, 1959–1966.
  72. Wu, X., Platt, J.L. and Cascalho, M. (2003) Dimerization of MLH1 and PMS2 limits nuclear localization of MutLalpha. *Mol. Cell. Biol.*, **23**, 3320–3328.
  73. Bulavin, D.V., Higashimoto, Y., Popoff, I.J., Gaarde, W.A., Basur, V., Potapova, O., Appella, E. and Fornace, A.J. Jr (2001) Initiation of a G<sub>2</sub>/M checkpoint after ultraviolet radiation requires p38 kinase. *Nature*, **411**, 102–107.
  74. Garner, A.P., Weston, C.R., Todd, D.E., Balmanno, K. and Cook, S.J. (2002) Delta MEKK3:ER\* activation induces a p38 alpha/beta 2-dependent cell cycle arrest at the G<sub>2</sub> checkpoint. *Oncogene*, **21**, 8089–8104.
  75. Morrison, C. and Rieder, C.L. (2004) Chromosome damage and progression into and through mitosis in vertebrates. *DNA Repair (Amsterdam)*, **3**, 1133–1139.
  76. Manke, I.A., Nguyen, A., Lim, D., Stewart, M.Q., Elia, A.E. and Yaffe, M.B. (2005) MAPKAP kinase-2 is a cell cycle checkpoint kinase that regulates the G<sub>2</sub>/M transition and S phase progression in response to UV irradiation. *Mol. Cell*, **17**, 37–48.
  77. Hirose, Y., Katayama, M., Stokoe, D., Haas-Kogan, D.A., Berger, M.S. and Pieper, R.O. (2003) The p38 mitogen-activated protein kinase pathway links the DNA mismatch repair system to the G<sub>2</sub> checkpoint and to resistance to chemotherapeutic DNA-methylating agents. *Mol. Cell. Biol.*, **23**, 8306–8315.
  78. Losa, J.H., Parada Cobo, C., Viniegra, J.G., Sanchez-Arevalo Lobo, V.J., Ramon y Cajal, S. and Sanchez-Prieto, R. (2003) Role of the p38 MAPK pathway in cisplatin-based therapy. *Oncogene*, **22**, 3998–4006.
  79. Mansouri, A., Ridgway, L.D., Korapati, A.L., Zhang, Q., Tian, L., Wang, Y., Siddik, Z.H., Mills, G.B. and Claret, F.X. (2003) Sustained activation of JNK/p38 MAPK pathways in response to cisplatin leads to Fas ligand induction and cell death in ovarian carcinoma cells. *J. Biol. Chem.*, **278**, 19245–19256.
  80. Wang, D. and Lippard, S.J. (2004) Cisplatin-induced post-translational modification of histones H3 and H4. *J. Biol. Chem.*, **279**, 20622–20625.
  81. Wei, Y., Mizzzen, C.A., Cook, R.G., Gorovsky, M.A. and Allis, C.D. (1998) Phosphorylation of histone H3 at serine 10 is correlated with chromosome condensation during mitosis and meiosis in Tetrahymena. *Proc. Natl Acad. Sci. USA*, **95**, 7480–7484.
  82. Wei, Y., Yu, L., Bowen, J., Gorovsky, M.A. and Allis, C.D. (1999) Phosphorylation of histone H3 is required for proper chromosome condensation and segregation. *Cell*, **97**, 99–109.
  83. Hans, F. and Dimitrov, S. (2001) Histone H3 phosphorylation and cell division. *Oncogene*, **20**, 3021–3027.
  84. Shtivelman, E., Sussman, J. and Stokoe, D. (2002) A role for PI 3-kinase and PKB activity in the G<sub>2</sub>/M phase of the cell cycle. *Curr. Biol.*, **12**, 919–924.
  85. Kandel, E.S., Skeen, J., Majewski, N., Di Cristofano, A., Pandolfi, P.P., Feliciano, C.S., Gartel, A. and Hay, N. (2002) Activation of Akt/protein kinase B overcomes a G<sub>2</sub>/m cell cycle checkpoint induced by DNA damage. *Mol. Cell. Biol.*, **22**, 7831–7841.
  86. Altio, S., Batt, D., Altio, N., Papautsky, A., Downward, J., Roberts, T.M. and Avraham, H. (1999) Heregulin induces phosphorylation of BRCA1 through phosphatidylinositol 3-Kinase/AKT in breast cancer cells. *J. Biol. Chem.*, **274**, 32274–32278.
  87. Wang, Y., Cortez, D., Yazdi, P., Neff, N., Elledge, S.J. and Qin, J. (2000) BASC, a super complex of BRCA1-associated proteins involved in the recognition and repair of aberrant DNA structures. *Genes Dev.*, **14**, 927–939.
  88. Wang, Q., Zhang, H., Guerrette, S., Chen, J., Mazurek, A., Wilson, T., Slupianek, A., Skorski, T., Fishel, R. and Greene, M.I. (2001) Adenosine nucleotide modulates the physical interaction between hMSH2 and BRCA1. *Oncogene*, **20**, 4640–4649.

89. Xu, X., Weaver, Z., Linke, S.P., Li, C., Gotay, J., Wang, X.W., Harris, C.C., Ried, T. and Deng, C.X. (1999) Centrosome amplification and a defective G<sub>2</sub>-M cell cycle checkpoint induce genetic instability in BRCA1 exon 11 isoform-deficient cells. *Mol. Cell*, **3**, 389–395.
90. Yarden, R.I., Pardo-Reoyo, S., Sgagias, M., Cowan, K.H. and Brody, L.C. (2002) BRCA1 regulates the G<sub>2</sub>/M checkpoint by activating Chk1 kinase upon DNA damage. *Nat. Genet.*, **30**, 285–289.
91. King, F.W., Skeen, J., Hay, N. and Shivelman, E. (2004) Inhibition of Chk1 by activated PKB/Akt. *Cell Cycle*, **3**, 634–637.
92. den Elzen, N., Kosoy, A., Christopoulos, H. and O'Connell, M.J. (2004) Resisting arrest: recovery from checkpoint arrest through dephosphorylation of Chk1 by PP1. *Cell Cycle*, **3**, 529–533.
93. Meikrantz, W., Bergom, M.A., Memisoglu, A. and Samson, L. (1998) O<sub>6</sub>-alkylguanine DNA lesions trigger apoptosis. *Carcinogenesis*, **19**, 369–372.
94. Gerson, S.L. (2004) MGMT: its role in cancer aetiology and cancer therapeutics. *Nat. Rev. Cancer*, **4**, 296–307.
95. D'Atri, S., Tentori, L., Lacal, P.M., Graziani, G., Pagani, E., Benincasa, E., Zambruno, G., Bonmassar, E. and Jiricny, J. (1998) Involvement of the mismatch repair system in temozolomide-induced apoptosis. *Mol. Pharmacol.*, **54**, 334–341.
96. Hickman, M.J. and Samson, L.D. (1999) Role of DNA mismatch repair and p53 in signaling induction of apoptosis by alkylating agents. *Proc. Natl Acad. Sci. USA*, **96**, 10764–10769.
97. Ochs, K. and Kaina, B. (2000) Apoptosis induced by DNA damage O<sub>6</sub>-methylguanine is Bcl-2 and caspase-9/3 regulated and Fas/caspase-8 independent. *Cancer Res.*, **60**, 5815–5824.
98. Roos, W., Baumgartner, M. and Kaina, B. (2004) Apoptosis triggered by DNA damage O<sub>6</sub>-methylguanine in human lymphocytes requires DNA replication and is mediated by p53 and Fas/CD95/Apo-1. *Oncogene*, **23**, 359–367.
99. Hickman, M.J. and Samson, L.D. (2004) Apoptotic signaling in response to a single type of DNA lesion, O(6)-methylguanine. *Mol. Cell*, **14**, 105–116.
100. Zong, W.X., Ditsworth, D., Bauer, D.E., Wang, Z.Q. and Thompson, C.B. (2004) Alkylating DNA damage stimulates a regulated form of necrotic cell death. *Genes Dev.*, **18**, 1272–1282.
101. Stojic, L., Cejka, P. and Jiricny, J. (2005) High doses of SN1 type methylating agents activate DNA damage signaling cascades that are largely independent of mismatch repair. *Cell Cycle*, **4**, 473–477.
102. Siddik, Z.H. (2003) Cisplatin: mode of cytotoxic action and molecular basis of resistance. *Oncogene*, **22**, 7265–7279.
103. Wang, D. and Lippard, S.J. (2005) Cellular processing of platinum anticancer drugs. *Nat. Rev. Drug Discov.*, **4**, 307–320.
104. Gong, J.G., Costanzo, A., Yang, H.Q., Melino, G., Kaelin, W.G. Jr, Leverro, M. and Wang, J.Y. (1999) The tyrosine kinase c-Abl regulates p73 in apoptotic response to cisplatin-induced DNA damage. *Nature*, **399**, 806–809.
105. Flores, E.R., Tsai, K.Y., Crowley, D., Sengupta, S., Yang, A., McKeon, F. and Jacks, T. (2002) p63 and p73 are required for p53-dependent apoptosis in response to DNA damage. *Nature*, **416**, 560–564.
106. Irwin, M.S., Kondo, K., Marin, M.C., Cheng, L.S., Hahn, W.C. and Kaelin, W.G. Jr (2003) Chemosensitivity linked to p73 function. *Cancer Cell*, **3**, 403–410.
107. Irwin, M.S. and Kaelin, W.G. (2001) p53 family update: p73 and p63 develop their own identities. *Cell Growth Differ.*, **12**, 337–349.
108. Yang, A., Kaghad, M., Caput, D. and McKeon, F. (2002) On the shoulders of giants: p63, p73 and the rise of p53. *Trends Genet.*, **18**, 90–95.
109. Tsai, K.K. and Yuan, Z.M. (2003) c-Abl stabilizes p73 by a phosphorylation-augmented interaction. *Cancer Res.*, **63**, 3418–3424.
110. Shimodaira, H., Yoshioka-Yamashita, A., Kolodner, R.D. and Wang, J.Y. (2003) Interaction of mismatch repair protein PMS2 and the p53-related transcription factor p73 in apoptosis response to cisplatin. *Proc. Natl Acad. Sci. USA*, **100**, 2420–2425.
111. Partlin, M.M., Homer, E., Robinson, H., McCormick, C.J., Crouch, D.H., Durant, S.T., Matheson, E.C., Hall, A.G., Gillespie, D.A. and Brown, R. (2003) Interactions of the DNA mismatch repair proteins MLH1 and MSH2 with c-MYC and MAX. *Oncogene*, **22**, 819–825.
112. Uramoto, H., Izumi, H., Ise, T., Tada, M., Uchiyama, T., Kuwano, M., Yasumoto, K., Funa, K. and Kohno, K. (2002) p73 Interacts with c-Myc to regulate Y-box-binding protein-1 expression. *J. Biol. Chem.*, **277**, 31694–31702.
113. Watanabe, K., Ozaki, T., Nakagawa, T., Miyazaki, K., Takahashi, M., Hosoda, M., Hayashi, S., Todo, S. and Nakagawa, A. (2002) Physical interaction of p73 with c-Myc and MM1, a c-Myc-binding protein, and modulation of the p73 function. *J. Biol. Chem.*, **277**, 15113–15123.
114. White, E. and Prives, C. (1999) DNA damage enables p73. *Nature*, **399**, 734–737.
115. Costanzo, A., Merlo, P., Pediconi, N. et al. (2002) DNA damage-dependent acetylation of p73 dictates the selective activation of apoptotic target genes. *Mol. Cell*, **9**, 175–186.
116. Mantovani, F., Piazza, S., Gostissa, M., Strano, S., Zacchi, P., Mantovani, R., Blandino, G. and Del Sal, G. (2004) Pin1 links the activities of c-Abl and p300 in regulating p73 function. *Mol. Cell*, **14**, 625–636.
117. Albert, A.L., Lavoie, S.B. and Vincent, M. (2004) Multisite phosphorylation of Pin1-associated mitotic phosphoproteins revealed by monoclonal antibodies MPM-2 and CC-3. *BMC Cell Biol.*, **5**, 22.
118. Fulco, M., Costanzo, A., Merlo, P., Mangiacasale, R., Strano, S., Blandino, G., Balsano, C., Lavia, P. and Leverro, M. (2003) p73 is regulated by phosphorylation at the G<sub>2</sub>/M transition. *J. Biol. Chem.*, **278**, 49196–49202.
119. Gaiddon, C., Lokshin, M., Gross, I., Levasseur, D., Taya, Y., Loeffler, J.P. and Prives, C. (2003) Cyclin-dependent kinases phosphorylate p73 at threonine 86 in a cell cycle-dependent manner and negatively regulate p73. *J. Biol. Chem.*, **278**, 27421–27431.
120. Gonzalez, S., Prives, C. and Cordon-Cardo, C. (2003) p73 $\alpha$  regulation by Chk1 in response to DNA damage. *Mol. Cell Biol.*, **23**, 8161–8171.
121. Urist, M., Tanaka, T., Poyurovsky, M.V. and Prives, C. (2004) p73 induction after DNA damage is regulated by checkpoint kinases Chk1 and Chk2. *Genes Dev.*, **18**, 3041–3054.
122. Youn, C.K., Cho, H.J., Kim, S.H., Kim, M.H., Chang, I.Y., Lee, J.S., Chung, M.H., Hahm, K.S. and You, H.J. (2005) Bcl-2 expression suppresses mismatch repair activity through inhibition of E2F transcriptional activity. *Nat. Cell Biol.*, **7**, 137–147.
123. Koshiji, M., To, K.K., Hammer, S., Kumamoto, K., Harris, A.L., Modrich, P. and Huang, L.E. (2005) HIF-1 $\alpha$  induces genetic instability by transcriptionally downregulating MutS $\alpha$  expression. *Mol. Cell*, **17**, 793–803.
124. Mihaylova, V.T., Bindra, R.S., Yuan, J., Campisi, D., Narayanan, L., Jensen, R., Giordano, F., Johnson, R.S., Rockwell, S. and Glazer, P.M. (2003) Decreased expression of the DNA mismatch repair gene Mlh1 under hypoxic stress in mammalian cells. *Mol. Cell Biol.*, **23**, 3265–3273.
125. Buermeier, A.B., Wilson-Van Patten, C., Baker, S.M. and Liskay, R.M. (1999) The human MLH1 cDNA complements DNA mismatch repair defects in Mlh1-deficient mouse embryonic fibroblasts. *Cancer Res.*, **59**, 538–541.
126. Raschle, M., Marra, G., Nystrom-Lahti, M., Schar, P. and Jiricny, J. (1999) Identification of hMutL $\beta$ , a heterodimer of hMLH1 and hPMS1. *J. Biol. Chem.*, **274**, 32368–32375.
127. Chang, D.K., Ricciardiello, L., Goel, A., Chang, C.L. and Boland, C.R. (2000) Steady-state regulation of the human DNA mismatch repair system. *J. Biol. Chem.*, **275**, 18424–18431.
128. Leung, W.K., Kim, J.J., Wu, L., Sepulveda, J.L. and Sepulveda, A.R. (2000) Identification of a second MutL DNA mismatch repair complex (hPMS1 and hMLH1) in human epithelial cells. *J. Biol. Chem.*, **275**, 15728–15732.
129. Parsons, R., Li, G.M., Longley, M.J., Fang, W.H., Papadopoulos, N., Jen, J., de la Chapelle, A., Kinzler, K.W., Vogelstein, B. and Modrich, P. (1993) Hypermutability and mismatch repair deficiency in RER<sup>+</sup> tumor cells. *Cell*, **75**, 1227–1236.
130. Tomlinson, I.P., Hampson, R., Karran, P. and Bodmer, W.F. (1997) DNA mismatch repair in lymphoblastoid cells from hereditary non-polyposis colorectal cancer (HNPCC) patients is normal under conditions of rapid cell division and increased mutational load. *Mutat. Res.*, **383**, 177–182.
131. Marra, G., D'Atri, S., Corti, C., Bonmassar, L., Cattaruzza, M.S., Schweizer, P., Heinemann, K., Bartosova, Z., Nystrom-Lahti, M. and Jiricny, J. (2001) Tolerance of human MSH2<sup>+</sup>/ lymphoblastoid cells to the methylating agent temozolomide. *Proc. Natl Acad. Sci. USA*, **98**, 7164–7169.
132. Lin, D.P., Wang, Y., Scherer, S.J. et al. (2004) An Msh2 point mutation uncouples DNA mismatch repair and apoptosis. *Cancer Res.*, **64**, 517–522.
133. Yang, G., Scherer, S.J., Shell, S.S., Yang, K., Kim, M., Lipkin, M., Kucherlapati, R., Kolodner, R.D. and Edelmann, W. (2004) Dominant effects of an Msh6 missense mutation on DNA repair and cancer susceptibility. *Cancer Cell*, **6**, 139–150.

134. Shin, K.H., Yang, Y.M. and Park, J.G. (1998) Absence or decreased levels of the hMLH1 protein in human gastric carcinoma cell lines: implication of hMLH1 in alkylation tolerance. *J. Cancer Res. Clin. Oncol.*, **124**, 421–426.
135. Shin, K.H. and Park, J.G. (2000) Microsatellite instability is associated with genetic alteration but not with low levels of expression of the human mismatch repair proteins hMSH2 and hMLH1. *Eur. J. Cancer*, **36**, 925–931.
136. Lettieri, T., Marra, G., Aquilina, G., Bignami, M., Crompton, N.E., Palombo, F. and Jiricny, J. (1999) Effect of hMSH6 cDNA expression on the phenotype of mismatch repair-deficient colon cancer cell line HCT15. *Carcinogenesis*, **20**, 373–382.
137. Claij, N. and Te Riele, H. (2002) Methylation tolerance in mismatch repair proficient cells with low MSH2 protein level. *Oncogene*, **21**, 2873–2879.
138. Lipkin, S.M., Rozek, L.S., Rennert, G. *et al.* (2004) The MLH1 D132H variant is associated with susceptibility to sporadic colorectal cancer. *Nat. Genet.*, **36**, 694–699.
139. Latif, C., Elzen, N.R. and O'Connell, M.J. (2004) DNA damage checkpoint maintenance through sustained Chk1 activity. *J. Cell Sci.*, **117**, 3489–3498.
140. Kramer, A., Mailand, N., Lukas, C., Syljuasen, R.G., Wilkinson, C.J., Nigg, E.A., Bartek, J. and Lukas, J. (2004) Centrosome-associated Chk1 prevents premature activation of cyclin-B-Cdk1 kinase. *Nat. Cell Biol.*, **6**, 884–891.
141. Huang, X., Tran, T., Zhang, L., Hatcher, R. and Zhang, P. (2005) DNA damage-induced mitotic catastrophe is mediated by the Chk1-dependent mitotic exit DNA damage checkpoint. *Proc. Natl Acad. Sci. USA*, **102**, 1065–1070.
142. Xiao, Z., Xue, J., Semizarov, D., Sowin, T.J., Rosenberg, S.H. and Zhang, H. (2005) Novel indication for cancer therapy: Chk1 inhibition sensitizes tumor cells to antimitotics. *Int. J. Cancer*, **115**, 528–538.
143. Xiao, Z., Xue, J., Sowin, T.J., Rosenberg, S.H. and Zhang, H. (2005) A novel mechanism of checkpoint abrogation conferred by Chk1 down-regulation. *Oncogene*, **24**, 1403–1411.
144. den Elzen, N.R. and O'Connell, M.J. (2004) Recovery from DNA damage checkpoint arrest by PP1-mediated inhibition of Chk1. *EMBO J.*, **23**, 908–918.
145. Bakkenist, C.J. and Kastan, M.B. (2004) Phosphatases join kinases in DNA-damage response pathways. *Trends Cell Biol.*, **14**, 339–341.
146. Lu, X., Nannenga, B. and Donehower, L.A. (2005) PPM1D dephosphorylates Chk1 and p53 and abrogates cell cycle checkpoints. *Genes Dev.*, **19**, 1162–1174.

Received September 22, 2005; revised November 22, 2005;  
accepted November 27, 2005
